# Supplementary material for: IC100, a humanized therapeutic monoclonal anti-ASC antibody alleviates oxygen-induced retinopathy in mice
Source: Springer Nature journal article supplement (doi:10.1007/s10456-024-09917-9), 2024-05-06
Supplement: MOESM1 [file 27060892]

### Online Supplement - Materials

| <b>Antibody list</b>                                                                                    | <b>Company</b> | <b>Item number</b> | <b>Usage</b>                       |
|---------------------------------------------------------------------------------------------------------|----------------|--------------------|------------------------------------|
| Goat anti-AIF-1                                                                                         | NovusBio       | NB100-0128         | Immunofluorescence (1:200)         |
| Mouse Anti-ASC                                                                                          | Santa Cruz     | sc-515414          | Immunofluorescence (5.0 mg/ml)     |
| Mouse Anti-GSDMDC1 (A7)                                                                                 | Santa Cruz     | sc-393656          | Immunofluorescence (1:50)          |
| Mouse Anti-IL-1 $\beta$ (3A6)                                                                           | Cell signaling | 12242              | Immunofluorescence (1:200)         |
| Alexa Fluor-594-isolection B4                                                                           | ThermoFisher   | I21413             | Immunofluorescence (20 $\mu$ g/ml) |
| Brilliant Violet 421 <sup>TM</sup> Anti-mouse CD206                                                     | BioLegend®     | 141717             | Immunofluorescence (1:250)         |
| Goat anti-Mouse IgG (H+L) Secondary Antibody, HRP                                                       | ThermoFisher   | 31430              | Western blot (1:10,000)            |
| Donkey anti-Mouse IgG (H+L) ReadyProbes <sup>TM</sup> Secondary Antibody, Alexa Fluor <sup>TM</sup> 594 | ThermoFisher   | R37115             | Immunofluorescence (1:200)         |
| Donkey anti-Goat IgG (H+L) Cross-Adsorbed Secondary Antibody, Alexa Fluor <sup>TM</sup> 594             | ThermoFisher   | A-11058            | Immunofluorescence (1:200)         |
|                                                                                                         |                |                    |                                    |
| <b>PCR primer list</b>                                                                                  | <b>Company</b> | <b>Item number</b> | <b>Usage</b>                       |
| Il1b                                                                                                    | ThermoFisher   | Mm00434228_m1      | qRT-PCR                            |
| Il6                                                                                                     | ThermoFisher   | Mm00434228_m1      | qRT-PCR                            |
| Il18                                                                                                    | ThermoFisher   | Mm00434226_m1      | qRT-PCR                            |
| Tnf                                                                                                     | ThermoFisher   | Mm00443258_m1      | qRT-PCR                            |
| Asc                                                                                                     | ThermoFisher   | Mm00445747_g1      | qRT-PCR                            |
| Gsdmd                                                                                                   | ThermoFisher   | Mm00509958_m1      | qRT-PCR                            |
| Nlrp3                                                                                                   | ThermoFisher   | Mm00443258_m1      | qRT-PCR                            |
| Vegf                                                                                                    | ThermoFisher   | Mm01281449_m1      | qRT-PCR                            |
|                                                                                                         |                |                    |                                    |
| <b>Other reagents</b>                                                                                   | <b>Company</b> | <b>Item number</b> | <b>Usage</b>                       |
| miRNeasy Mini Kit                                                                                       | Qiagen         | 217004             | RNA isolation                      |
| SuperScript <sup>TM</sup> III CellsDirect <sup>TM</sup> cDNA Synthesis Kit                              | ThermoFisher   | 18080200           | cDNA synthesis                     |
| cOmplete ULTRA Tablets, Mini, EASYpack, Protease Inhibitor Cocktail                                     | Roche          | 05892970001        | Western blot                       |

## Online Supplement – Results

**Figure 1. Hyperoxia dysregulates gene pathways associated with tissue remodeling, angiogenesis, inflammation, and eye development.** **a.** Volcano plot of differentially expressed genes between O<sub>2</sub>-PBS and RA-PBS (red: FDR<0.1 and fold-change > 1.5). **b.** Heatmap of differentially expressed genes between O<sub>2</sub>-PBS and RA-PBS. Hyperoxia induced 580 genes and suppressed 342 genes. **c.** Dot plot showing gene set enrichment analysis for Gene Ontology terms associated with genes induced by hyperoxia. Hyperoxia-induced genes were associated with extracellular matrix organization, angiogenesis, and inflammatory response. **d.** Dot plot showing gene set enrichment analysis for Gene Ontology terms associated with genes suppressed by hyperoxia. Hyperoxia-suppressed genes were associated with eye development, neural precursor proliferation, and synaptic transmission. **e.** Network plot for Gene Ontology Biological Processes associated with genes induced by hyperoxia compared to room air. **f.** Network plot for Gene Ontology Biological Processes associated with genes suppressed by hyperoxia compared to room air.

**Figure 2. IC100 modulates hyperoxia-induced and suppressed gene pathways in hyperoxia-exposed retinas.** **a.** Volcano plot of differentially expressed genes between O<sub>2</sub>-IC100 and O<sub>2</sub>-PBS (red: FDR<0.1 and fold-change > 1.5). **b.** Heatmap of differentially expressed genes between O<sub>2</sub>-IC100 and O<sub>2</sub>-PBS. Hyperoxia induced 350 genes and suppressed 128 genes. **c.** Dot plot showing gene set enrichment analysis for Gene Ontology terms associated with genes induced by IC100 in the setting of hyperoxia. IC100-induced genes were associated with extracellular matrix organization, angiogenesis, and tissue remodeling. **d.** Dot plot showing gene set enrichment analysis for Gene Ontology terms associated with genes suppressed by IC100 in hyperoxia. IC100

suppressed genes associated with neurogenesis, synapse assembly, and GABA signaling. **e.** Network plot for Gene Ontology Biological Processes associated with genes induced by IC100 in the setting of hyperoxia compared to hyperoxia alone. **f.** Network plot for Gene Ontology Biological Processes associated with genes suppressed by IC100 in the setting of hyperoxia compared to hyperoxia alone.

**Figure 3. Comparison of gene pathways in RA-PBS and O<sub>2</sub>-IC100 retinas.** **a.** Volcano plot of differentially expressed genes between O<sub>2</sub>-IC100 and RA-PBS (red: FDR<0.1 and fold-change > 1.5). **b.** Heatmap of differentially expressed genes between O<sub>2</sub>-IC100 and RA-PBS. IC100 induced 248 genes and suppressed 284 genes in O<sub>2</sub>-exposed retinas compared to normal retinas. **c.** Dot plot showing gene set enrichment analysis for Gene Ontology terms associated with genes induced by IC100 in O<sub>2</sub>-exposed retinas compared to normally developing retinas. IC100-induced genes related to inflammatory response, angiogenesis, and cell migration. **d.** Dot plot showing gene set enrichment analysis for Gene Ontology terms associated with genes suppressed by IC100 in O<sub>2</sub>-exposed retinas compared to normally developing retinas. IC100 suppressed genes related to neurogenesis, axonogenesis, and dendrite development. **e.** Network plot for Gene Ontology Biological Processes associated with genes induced by IC100 in O<sub>2</sub>-exposed retinas compared to RA-exposed retinas. **f.** Network plot for Gene Ontology Biological Processes associated with genes suppressed by IC100 in O<sub>2</sub>-exposed retinas compared to RA-exposed retinas.
