# Supplementary material for: IC100, a humanized therapeutic monoclonal anti-ASC antibody alleviates oxygen-induced retinopathy in mice
Source: Springer Nature journal article supplement (doi:10.1007/s10456-024-09917-9), 2024-05-06

**Figure 1**

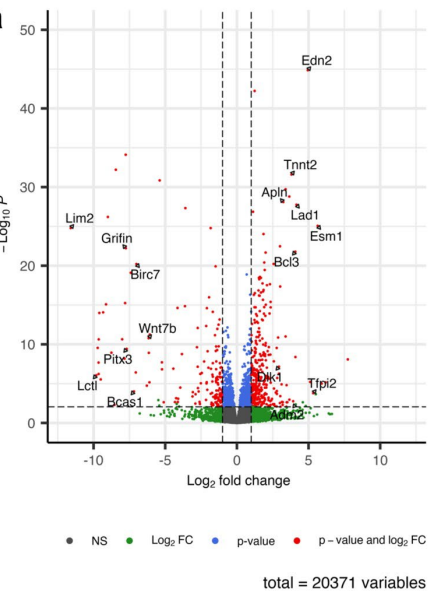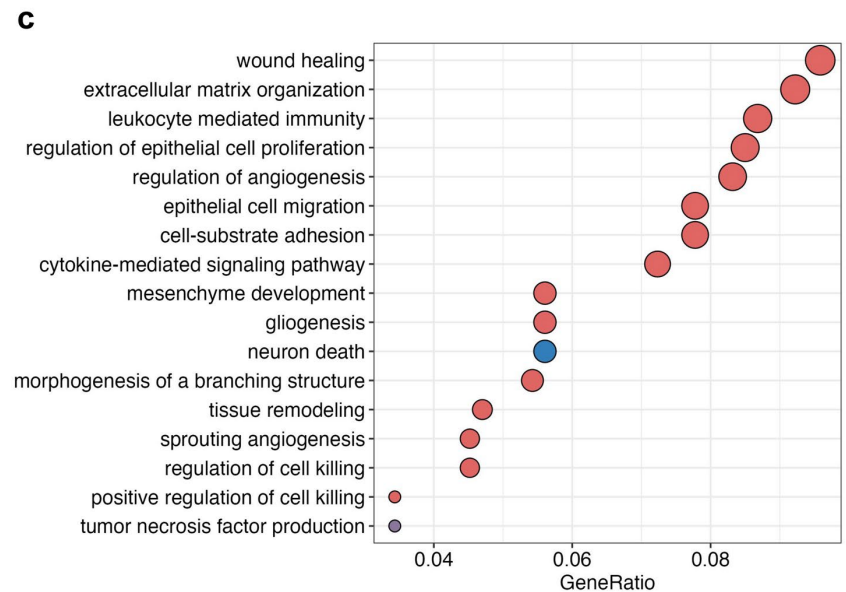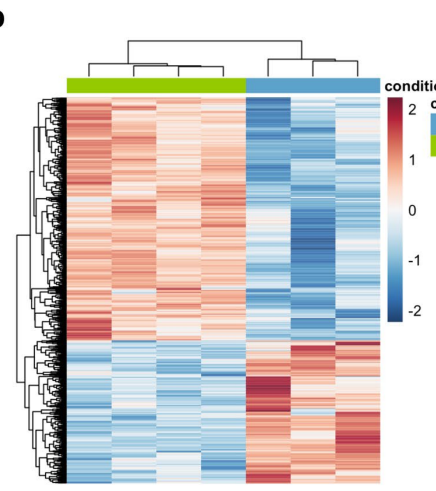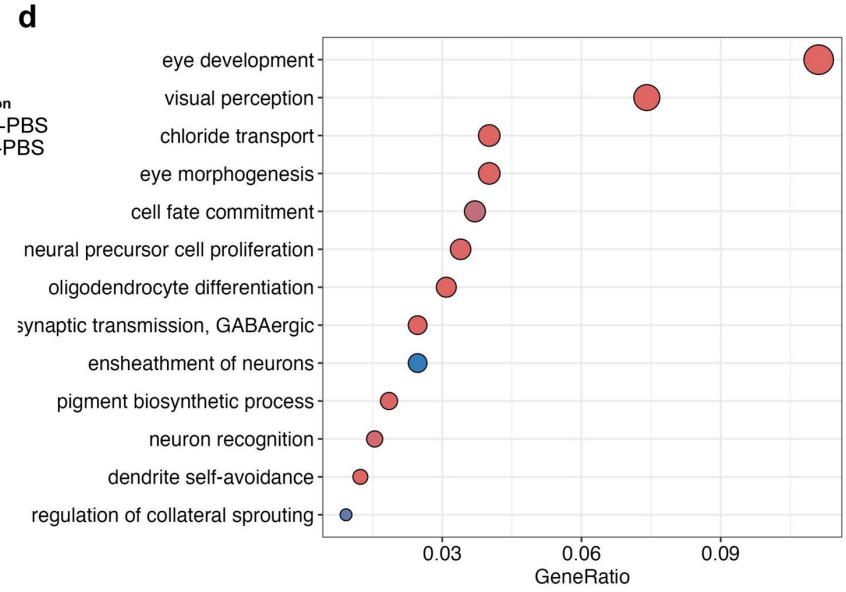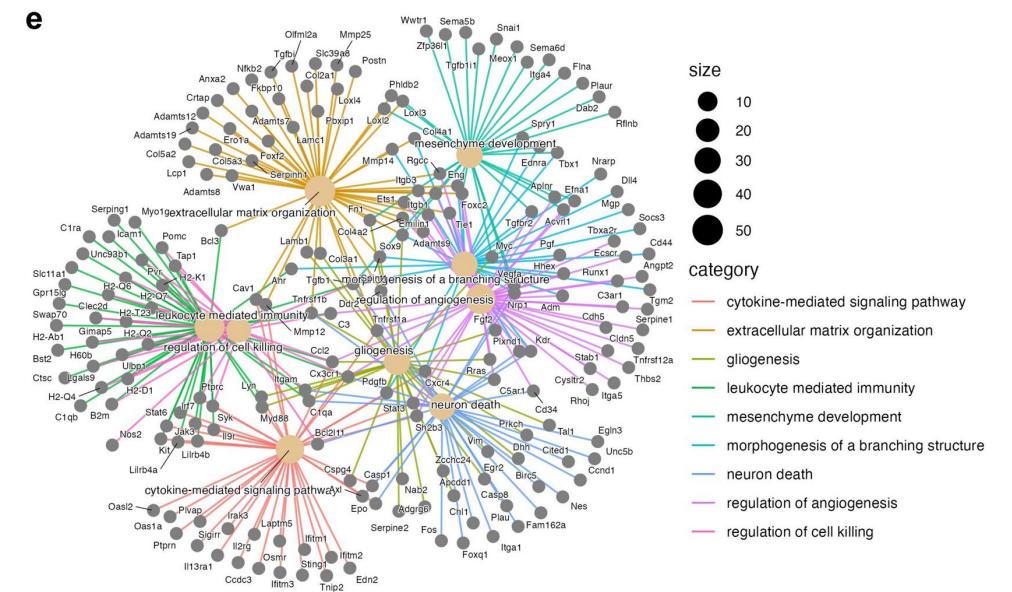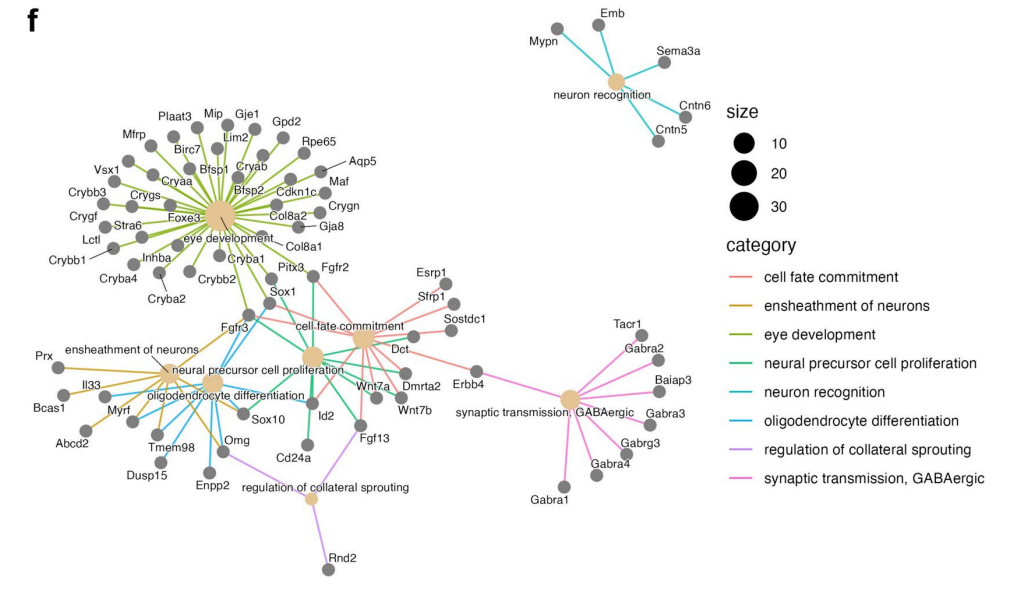

**Figure 2**

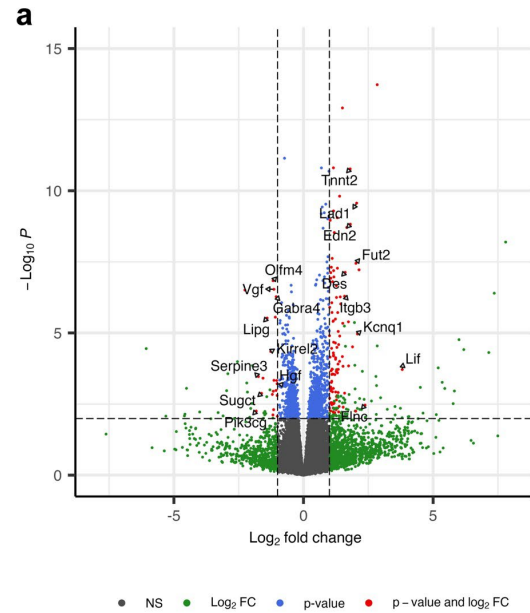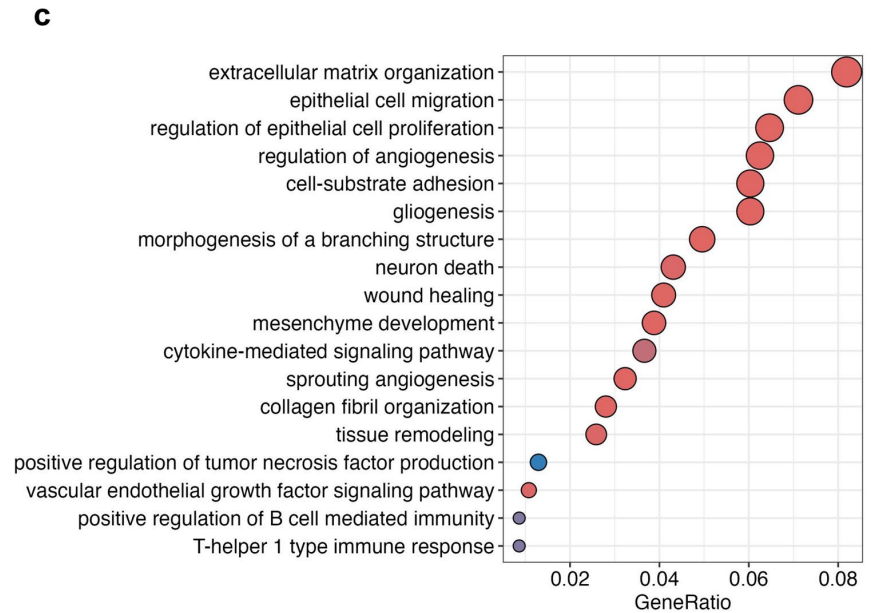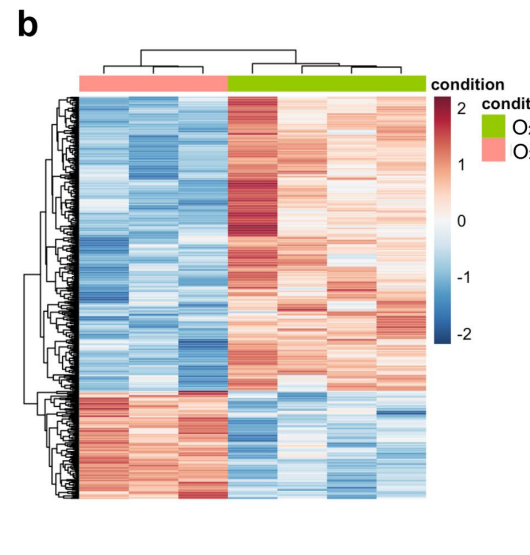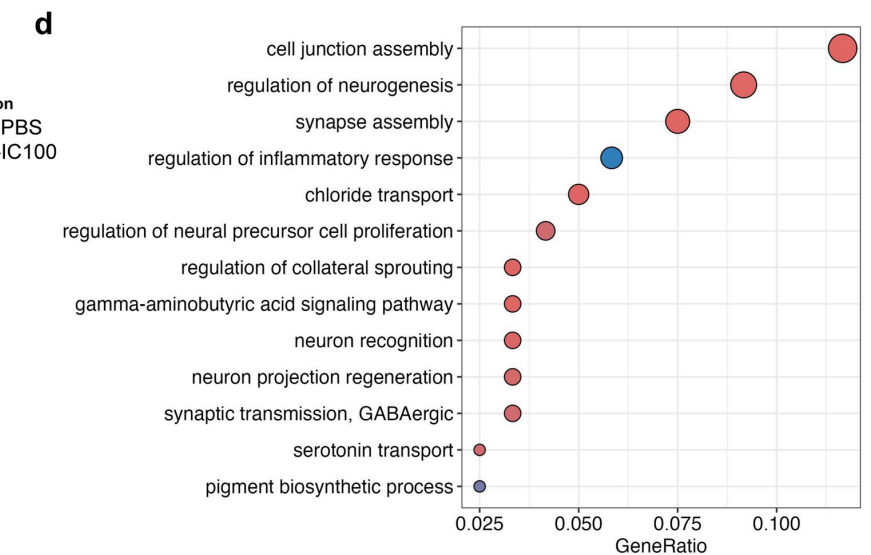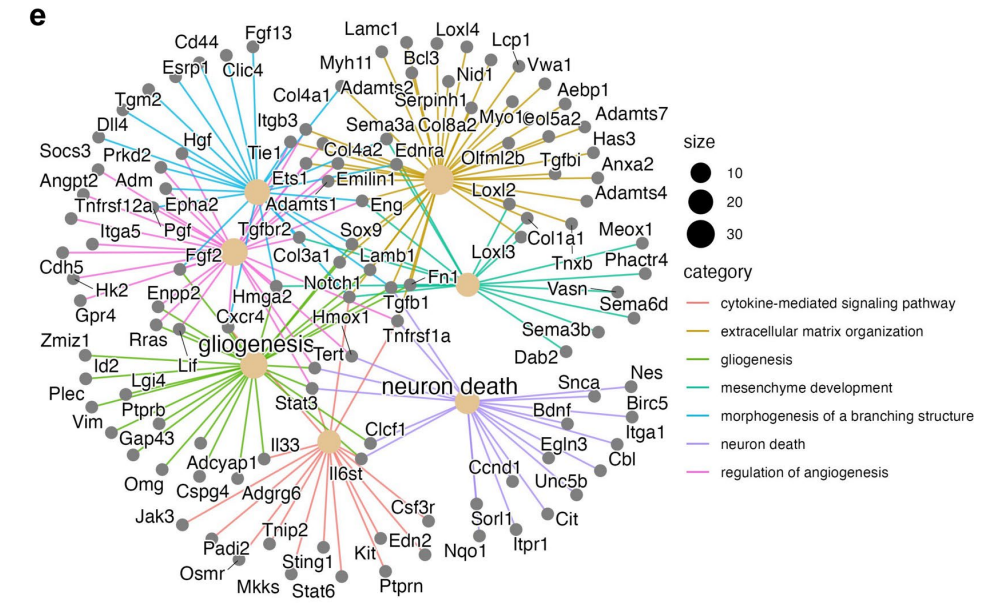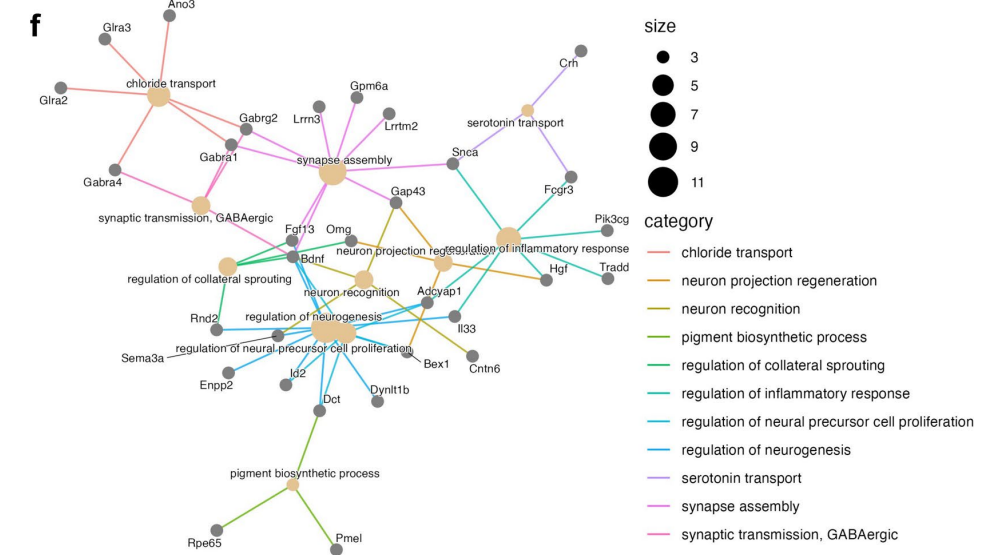

**Figure 3**

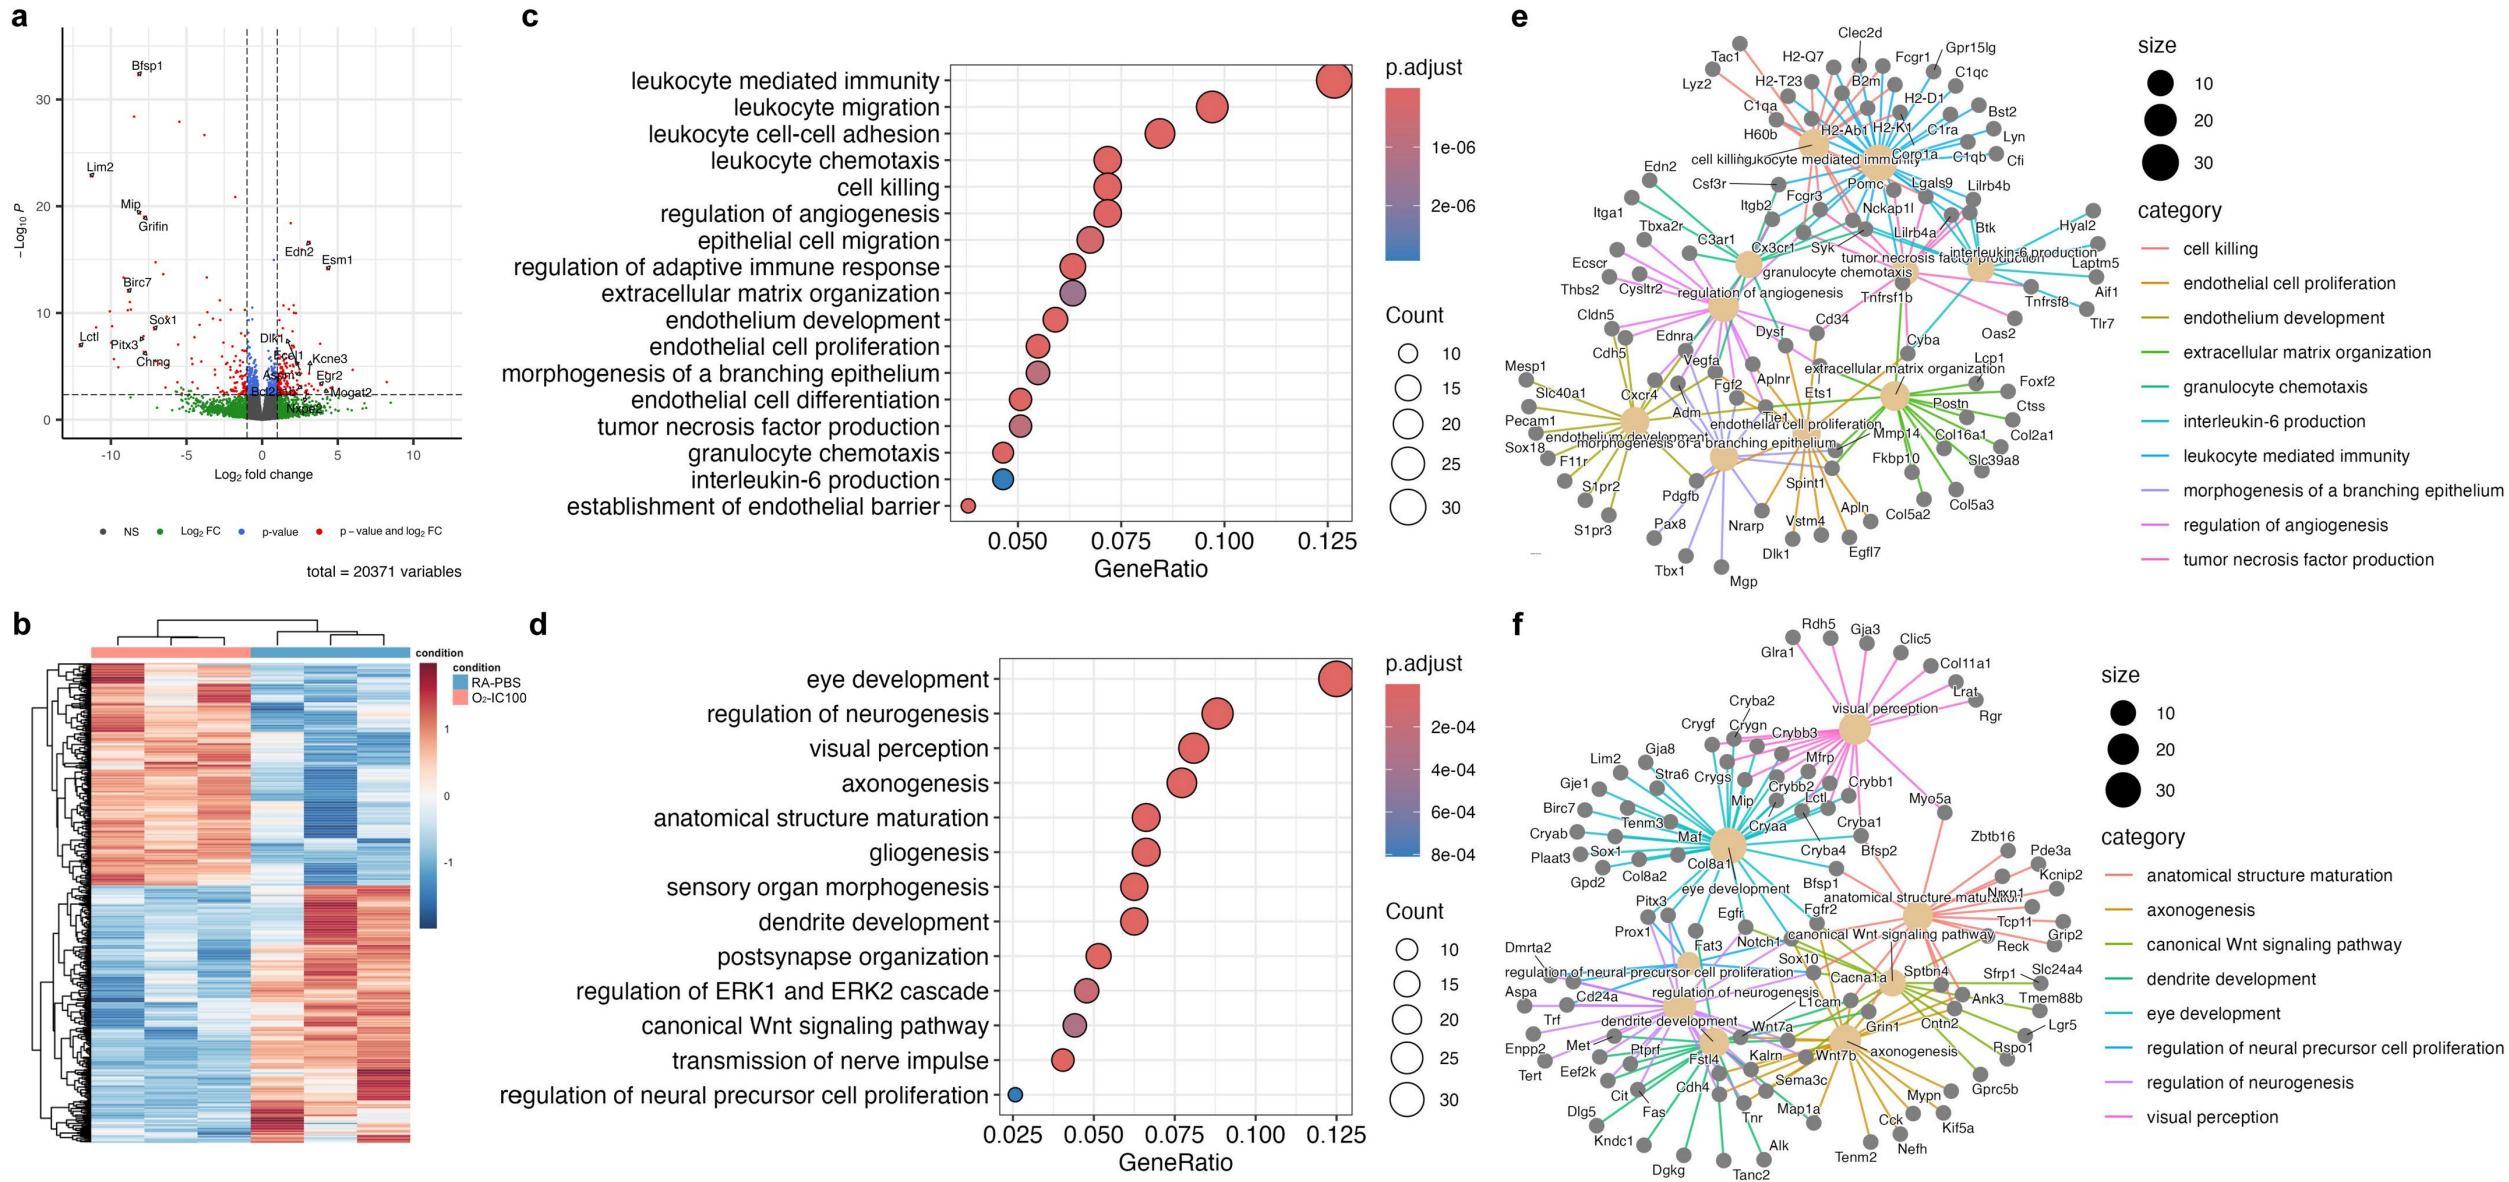

Supplement: MOESM2 [file 27060892]
